# Supplementary material
Source: PubMed Central journal article supplement (PMC2792317)
Supplement: bgp256_5.pdf [file bgp256_5.pdf]

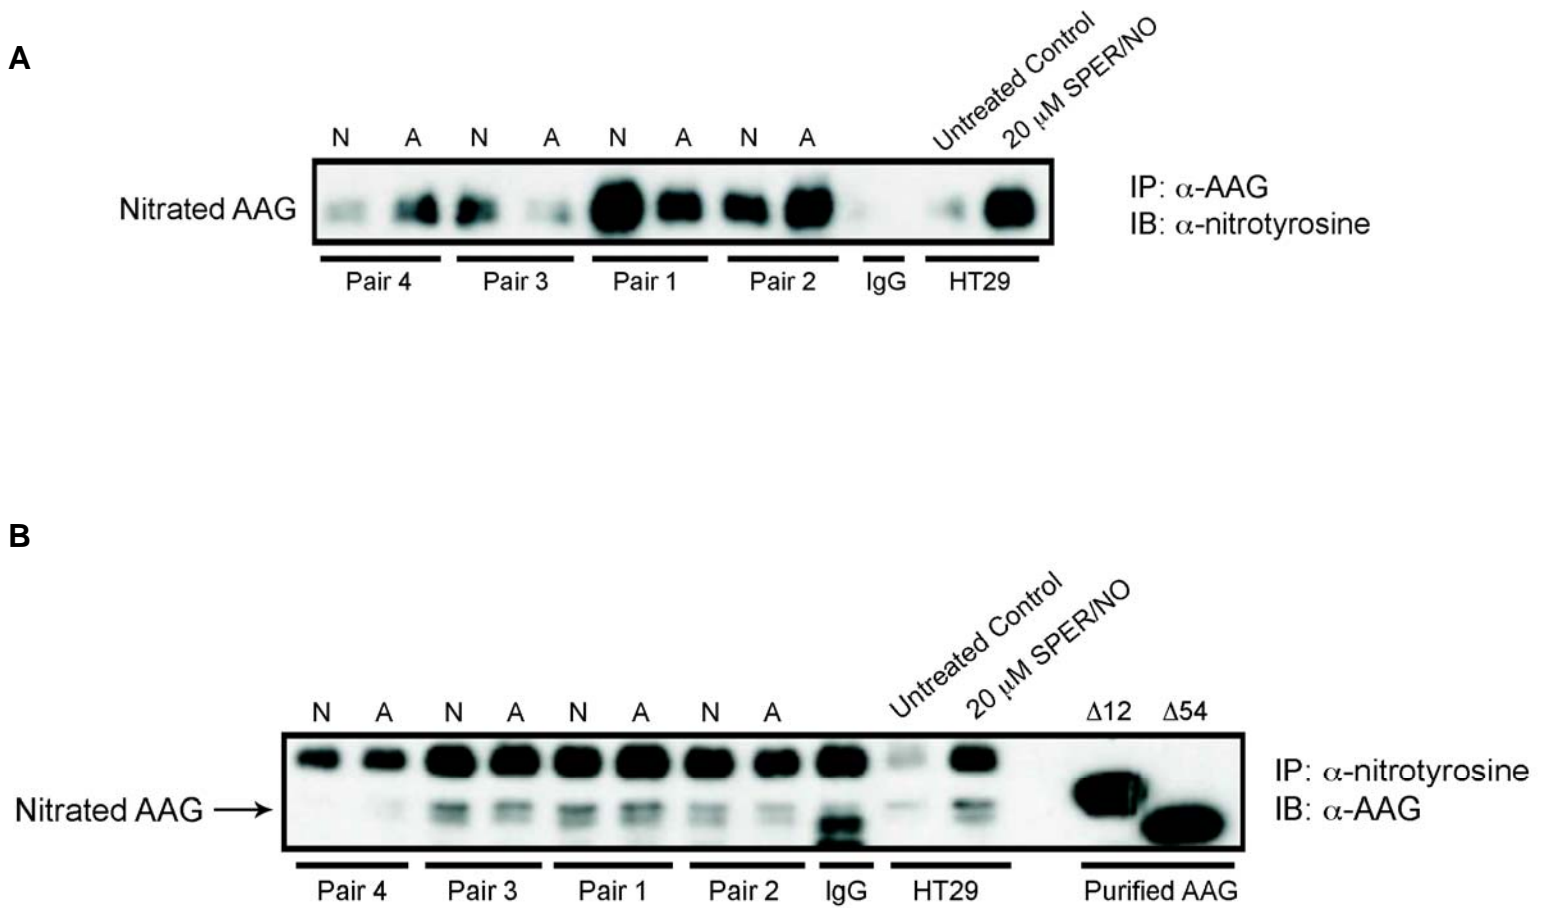

**Supplementary Figure 5.** Nitration of AAG in human tissues and in HT29 cells. **(A)** AAG was immunoprecipitated (IP) from human tissues using the anti-AAG antibody and nitrated AAG was detected by western blot (IB) using the anti-nitrotyrosine antibody in non-tumor (N) and adenoma tissues (A) from four patients. Also shown is the IgG control, and immunoprecipitation from extracts of HT-29 colon adenoma cells untreated or treated with 20  $\mu$ M SPER/NO for 4 h. **(B)** Nitrated proteins were immunoprecipitated using the anti-nitrotyrosine antibody followed by detection of AAG by western blot. Also shown is the IgG control and immunoprecipitation from extracts from HT-29 colon adenoma cells untreated or treated with 20  $\mu$ M SPER/NO for 4 h. Purified AAG ( $\Delta$ 12 and  $\Delta$ 54 N-terminal truncated, see Materials and Methods) was included as references. Images shown are representative blots from at least three independent experiments.
