# Supplementary material
Source: PubMed Central journal article supplement (PMC2792317)
Supplement: bgp256_6.pdf [file bgp256_6.pdf]

**Supplementary Table I.** Calculated enzyme kinetic values of wild-type AAG following ONOO<sup>-</sup> treatment, from Figure 2C (See Materials and Methods).

| Wild-type AAG           | $K_m$<br>(nM) | $V_{max}$<br>(mol <sup>16</sup> /min) | $V_{max}/K_m$<br>(mol <sup>16</sup> × min <sup>-1</sup> × nM <sup>-1</sup> ) |
|-------------------------|---------------|---------------------------------------|------------------------------------------------------------------------------|
| Untreated Control       | 10.8 ± 1.0    | 6.58                                  | 0.61 ± 0.05                                                                  |
| 10 μM ONOO <sup>-</sup> | 13.0 ± 1.6    | 5.9                                   | 0.45 ± 0.05                                                                  |
| 20 μM ONOO <sup>-</sup> | 12.9 ± 0.7    | 4.4                                   | 0.34 ± 0.05                                                                  |
| 40 μM ONOO <sup>-</sup> | 13.7 ± 1.4    | 4.0                                   | 0.29 ± 0.02                                                                  |
