# Supplementary material
Source: PubMed Central journal article supplement (PMC2792317)
Supplement: bgp256_7.pdf [file bgp256_7.pdf]

**Supplementary Table II.** The calculated enzyme kinetic values of wild-type AAG and AAG variants, C167S and C178S, following SPER/NO treatment (See Materials and Methods).

|        | <b>Control</b>            |                                   | <b>20 <math>\mu</math>M SPER/NO</b> |                                   | <b>40 <math>\mu</math>M SPER/NO</b> |                                   |
|--------|---------------------------|-----------------------------------|-------------------------------------|-----------------------------------|-------------------------------------|-----------------------------------|
|        | <i>K<sub>M</sub></i> (nM) | <i>V<sub>max</sub></i> (fmol/min) | <i>K<sub>M</sub></i> (nM)           | <i>V<sub>max</sub></i> (fmol/min) | <i>K<sub>M</sub></i> (nM)           | <i>V<sub>max</sub></i> (fmol/min) |
| WT AAG | 19.2 $\pm$ 2.1            | 15.8 $\pm$ 0.5                    | 18.1 $\pm$ 1.9                      | 25.2 $\pm$ 0.7                    | 19.6 $\pm$ 2.5                      | 24.0 $\pm$ 0.8                    |
| C167S  | 42.3 $\pm$ 7.9            | 35.6 $\pm$ 2.3                    | 40.7 $\pm$ 7.9                      | 32.8 $\pm$ 2.2                    | 40.0 $\pm$ 6.5                      | 32.4 $\pm$ 1.8                    |
| C178S  | 41.6 $\pm$ 16.0           | 50.1 $\pm$ 6.9                    | 36.4 $\pm$ 15.0                     | 47.2 $\pm$ 6.7                    | 87.7 $\pm$ 14.0                     | 97.9 $\pm$ 6.9                    |
